# Supplementary material
Source: PubMed Central journal article supplement (PMC4591098)
Supplement: NIHMS677078-supplement-11356_2015_4383_MOESM1_ESM.pdf [file NIHMS677078-supplement-11356_2015_4383_MOESM1_ESM.pdf]

# **Toxicokinetics of Chiral Polychlorinated Biphenyls Across Different Species—A Review**

## **SUPPLEMENTARY MATERIAL**

### **Environmental Science and Pollution Research**

Izabela Kania-Korwel and Hans-Joachim Lehmler\*

Department of Occupational and Environmental Health, College of Public Health, The University  
of Iowa, Iowa City, Iowa

\* To whom correspondence should be addressed:

Hans-Joachim Lehmler

The University of Iowa

Department of Occupational and Environmental Health

UI Research Park, #221 IREH

Iowa City, Iowa 52242

Phone: (319) 335-4211

Fax: (319) 335-4290

e-mail: [hans-joachim-lehmler@uiowa.edu](mailto:hans-joachim-lehmler@uiowa.edu)

**Table S1.** Levels of chiral PCBs in human blood samples. All units were adjusted to ng/g, see footnotes. The table is organized by continent, country and publication year in descending order. Highest values for a congener are marked in bold.

| Sample                                                     | Country/<br>population       | Number | PCB 91          | PCB 95                 | PCB 132 | PCB 136        | PCB 149              | PCB 183                | Analytical<br>method | Ref/<br>year                                           |
|------------------------------------------------------------|------------------------------|--------|-----------------|------------------------|---------|----------------|----------------------|------------------------|----------------------|--------------------------------------------------------|
| <i>North America</i>                                       |                              |        |                 |                        |         |                |                      |                        |                      |                                                        |
| <i>NHANES- large general population study</i>              |                              |        |                 |                        |         |                |                      |                        |                      |                                                        |
| serum                                                      | US/gen. pop.<br>(NHANES)     | 1873   |                 |                        |         |                | 0.004 <sup>a</sup>   | 0.01 <sup>a</sup>      | GC/HRMS              | (Patterson et al. 2009)<br>2009                        |
|                                                            | US/gen. pop.<br>(NHANES)     | 2285   |                 |                        |         |                | 0.004                | 0.009                  |                      |                                                        |
| serum                                                      | US/gen. pop.<br>(NHANES)     | 2547   |                 |                        |         |                | nd                   | nd                     | HRGC/<br>HRMS        | (Center for Disease<br>Control and Prevention<br>2009) |
|                                                            | US/gen. pop.<br>(NHANES)     | 2274   |                 |                        |         |                | na                   | nd                     |                      |                                                        |
| <i>fish-eating populations, including Native Americans</i> |                              |        |                 |                        |         |                |                      |                        |                      |                                                        |
| serum                                                      | US/natives                   | 277    |                 |                        |         |                |                      | nd-0.35                | GC/ECD               | (Goncharov et al.<br>2008)<br>2008                     |
| serum                                                      | Greenland/<br>gen. pop.      | 70     |                 |                        |         |                |                      | 0.06-1.47              | GC/MS                | (Rusiecki et al. 2008)<br>2008                         |
| serum                                                      | US/workers                   | 180    |                 |                        |         |                |                      | 0-0.05                 |                      |                                                        |
| serum                                                      | US/fish<br>eaters            | 217    |                 |                        |         |                |                      | 0-0.04                 | GC/ECD               | (Freels et al. 2007)<br>2007                           |
| serum                                                      | US/older pop.<br>fish eaters | 253    |                 |                        |         |                |                      | 0.05 <sup>d</sup>      | GC/ECD               | (Fitzgerald et al. 2007)<br>2007                       |
| serum                                                      | US/sport<br>fishers          | 99     |                 |                        |         |                |                      | <b>8.5<sup>c</sup></b> | GC/ECD               | (Turyk et al. 2006)<br>2006                            |
| serum                                                      | US/<br>natives               | 314    |                 |                        |         |                | <b>0.8-8.6</b>       | 1.8-5.0                | GC/MS                | (Schaeffer et al. 2006)<br>2006                        |
| plasma                                                     | Greenland/<br>Inuit women    | 153    |                 |                        |         |                |                      | 0.04-0.96              | GC/ECD               | (Côté et al. 2006)<br>2006                             |
| serum                                                      | US/sport<br>fishers          | 308    |                 | 0.02-0.36 <sup>b</sup> |         | 0.003-<br>0.37 | 0.01-1.0             | nd-0.28                | GC/ECD               | (Bloom et al. 2005)<br>2005                            |
| serum                                                      | US/natives                   | 753    | nd- <b>0.19</b> | nd-0.32                | nd-0.23 | nd-0.16        | nd-0.25 <sup>b</sup> | nd-0.75                | dGC/ECD              | (DeCaprio et al. 2005)<br>2005                         |
| serum                                                      | US/natives                   | 271    | nd-0.04         | nd-0.15                | nd-0.08 | nd-0.08        | nd-0.12 <sup>b</sup> | nd-0.15                | dGC/ECD              | (Schell et al. 2003)<br>2003                           |
| serum                                                      | US/sport<br>fishers          | 66     |                 |                        |         |                |                      | 0.01-0.19              | GC/ECD               | (Bloom et al. 2003)<br>2003                            |

| Sample                                   | Country/<br>population                | Number | PCB 91  | PCB 95             | PCB 132 | PCB 136        | PCB 149              | PCB 183              | Analytical<br>method | Ref/<br>year                           |
|------------------------------------------|---------------------------------------|--------|---------|--------------------|---------|----------------|----------------------|----------------------|----------------------|----------------------------------------|
| serum                                    | US/fish<br>eaters                     | 101    |         |                    |         |                |                      | nd-1.7               | GC/ECD               | (Humphrey et al. 2000)<br>2000         |
|                                          | US/gen. pop.                          | 78     |         |                    |         |                |                      | nd-0.6               |                      |                                        |
| serum                                    | US/natives.                           | 282    | nd-0.19 | nd-0.29            | nd-0.17 | nd-0.16        | nd-0.24 <sup>b</sup> | nd-0.55              | GC/ECD               | (DeCaprio et al. 2000)<br>2000         |
| serum                                    | US/natives                            | 61     | 0-0.02  | 0-0.1 <sup>b</sup> |         | 0-0.68         | 0-0.02               | 0.02-0.38            | GC/ECD               | (Gerstenberger et al.<br>2000)<br>2000 |
| plasma                                   | Canada/fish<br>eaters                 | 43     |         |                    |         |                |                      | nd-0.08              | GC/ECD               | (Kosatsky et al. 1999)<br>1999         |
| serum                                    | US/sport<br>fishers                   | 32     |         |                    |         |                |                      | 0.01-0.4             | GC/HRMS              | (Anderson et al. 1998)<br>1998         |
| serum                                    | US/seafood<br>eaters                  | 23     |         |                    |         |                |                      | nd-2.29              | GC/ECD               | (Burse et al. 1994)<br>1994            |
| <i>epidemiological studies on cancer</i> |                                       |        |         |                    |         |                |                      |                      |                      |                                        |
| plasma                                   | Canada/<br>caner                      | 214    |         |                    |         |                |                      | up to 0.04           | GC?ECD               | (Aronson et al. 2010)<br>1997-8        |
| plasma                                   | Canada<br>/gen.pop.and<br>non-H lymph | 422    |         |                    |         |                |                      | nd-84.86             | dGC/ECD              | (Spinelli et al. 2007)<br>2007         |
| plasma                                   | US/non-H<br>lymp                      | 200    |         |                    |         |                |                      | nd-0.4               | GC/MS                | (De Roos et al. 2005)<br>2005          |
| <i>other</i>                             |                                       |        |         |                    |         |                |                      |                      |                      |                                        |
| plasma                                   | Canada/<br>natives.                   | 1776   |         |                    |         |                |                      | 0.0-0.5              | HRGC/MS              | (Liberda et al. 2014)<br>2002-09       |
| plasma                                   | Canada/<br>elder                      | 1979   |         |                    |         |                |                      | 0.02-0.05            | GC/MS                | (Medehouenou et al.<br>2011)1991-2001  |
| plasma                                   | Canada/<br>women                      | 109    |         |                    |         |                |                      | nd-0.06              | GC/MS                | (Sandanger et al.<br>2007)<br>2007     |
| plasma                                   | Canada/<br>women                      | 385    |         |                    |         |                |                      | nd-0.44              | GC/ECD               | (Butler Walker et al.<br>2003) 2003    |
| plasma                                   | Canada/<br>cord                       | 30     |         |                    |         | 0.001-<br>0.65 | nd-0.1               | 0.002-0.14           | GC/MS                | (Sandau et al. 2002)<br>2002           |
| cord<br>plasma                           | Canada/<br>Inuit                      | 35     |         |                    |         |                |                      | 0.4 <sup>c</sup>     | GC/CED               | (Pereg et al. 2002)<br>2002            |
| plasma                                   | Canada/<br>gen. pop.                  | 68     |         |                    |         |                |                      | 0.00004 <sup>e</sup> | GC/ECD               | (Longnecker et al.<br>2000) 2000       |

| Sample         | Country/<br>population | Number | PCB 91 | PCB 95                     | PCB 132         | PCB 136            | PCB 149                     | PCB 183               | Analytical<br>method | Ref/<br>year                         |
|----------------|------------------------|--------|--------|----------------------------|-----------------|--------------------|-----------------------------|-----------------------|----------------------|--------------------------------------|
| serum          | US/Anniston            | 765    |        |                            |                 |                    | nd-0.31                     | nd-3.5                | HRGC/ID-<br>HRMS     | (Pavuk et al. 2014)<br>1996-98       |
| serum          | US/gen. pop.           | 85     | nd     | nr                         |                 |                    | nd                          | 0-0.01                | HRGC/HRM<br>S        | (Marek et al. 2013)<br>2008-09       |
| serum          | US/gen. pop.           | 26     | nd     | nd                         |                 | nd                 | nd                          |                       | GC/ECD               | (Knobeloch et al. 2012)<br>2004-05   |
| serum          | US/gen. pop            | 37     |        |                            |                 |                    |                             | 0.014-<br>0.016       | GC/ECD               | (Arguin et al. 2010)                 |
| serum          | US/women               | 17     |        |                            |                 |                    |                             | 0.007                 | GC/HRMS              | (LaKind et al. 2009)<br>2008         |
| serum          | US/construct           | 6      |        | 0.022 <sup>b,c</sup>       |                 | 0.003 <sup>c</sup> | 0.009 <sup>c</sup>          | 0.036 <sup>c</sup>    | GC/ECD               | (Herrick et al. 2007)<br>2007        |
| serum          | US/gen.pop.            | 50     |        | 0.05 <sup>b</sup>          |                 |                    | 0.7                         | 0.09                  | GC/MS and<br>HRMS    | (Schantz et al. 2007)<br>2007        |
| serum          | US/women               | 15     |        |                            | nd- <b>8.58</b> | 0.54- <b>22.3</b>  |                             | 2.17-6.97             | GC/CED               | (Whitcomb et al. 2005)<br>2005       |
| serum          | US/Anniston            | 12     |        | nd-0.06                    |                 | nd-0.09            | nd-0.11 <sup>b</sup>        | nd-0.68               | GC/ECD               | (Hansen et al. 2003)<br>2003         |
| plasma         | US/obese<br>men        | 36     |        |                            |                 |                    |                             | 0.02 <sup>c</sup>     | GC?ECD               | (Bray et al. 2002)<br>2000           |
| serum          | US/gen. pop.           | 10     |        |                            |                 |                    |                             | nd-0.37               | GC/ECD               | (Najam et al. 1999)<br>1999          |
| plasma         | US/gen. pop.           | 68     |        |                            |                 |                    | 0.03                        | 0.04-0.06             | HRGC/ECD             | (DeVoto et al. 1997)<br>1997         |
| whole<br>blood | US/gen. pop.           | 1      | nd     | 0.13 <sup>b</sup>          |                 | 3.2                | 0.025                       | 0.25                  | GC/ECD               | (Wilson-Yang et al.<br>1992) 1992    |
| serum          | US/<br>occup. exp.     | 165    |        | 0.4- <b>93<sup>b</sup></b> |                 |                    |                             | 0.06-26               | GC/ECD               | (Wolff et al. 1992)<br>1992          |
| serum          | US/<br>children        | 8      |        | 3.8                        |                 |                    |                             |                       | GC/ECD               | (Wolff and Schecter<br>1991)<br>1991 |
| serum          | US/<br>gen. pop.       | 29     |        |                            |                 |                    |                             | 0.03-0.2              | dGC/ECD              | (Duebelbeis et al.<br>1989) 1989     |
|                | US/<br>occup. exp.     | 3      |        |                            |                 |                    |                             | 0.3-2.0               |                      |                                      |
| serum          | US/<br>occup. exp.     | 52     |        |                            |                 |                    | 0.16- <b>11<sup>b</sup></b> | 0.14-6.9 <sup>b</sup> | GC/MS and<br>ECD     | (Fait et al. 1989)<br>1989           |
|                | US/gen.pop.            | 56     |        |                            | 0.08            |                    | 0.15-5.5                    | 0.05-2.4              |                      |                                      |

| Sample               | Country/<br>population   | Number | PCB 91 | PCB 95  | PCB 132 | PCB 136 | PCB 149        | PCB 183                   | Analytical<br>method | Ref/<br>year                           |
|----------------------|--------------------------|--------|--------|---------|---------|---------|----------------|---------------------------|----------------------|----------------------------------------|
| serum                | US/gen. pop.             | 243    |        |         |         |         |                | 0.052 <sup>c</sup>        | HRGC/LRM<br>S        | (Patterson et al. 1989)<br>1989        |
| serum                | US/mothers<br>US/fetus   | 101    |        |         | 0.05    |         |                | 0.07 <sup>c</sup><br>0.03 | GC/ECD               | (Bush et al. 1984)<br>1984             |
| plasma               | Mexico/chilren           | 45     |        |         |         |         |                | nd                        | GC?MS                | (Trejo-Acevedo et al.<br>2012)<br>2006 |
| serum                | US/Mex-Am<br>women       | 285    |        |         |         |         |                | nd-8.2                    | HRGC/<br>HRMS        | (Chevrier et al. 2007)<br>2007         |
| serum                | Mexico                   | 123    |        |         |         |         |                | nd -0.004                 | GC/MS                | (Orta-García et al.<br>2014)<br>2010   |
| <i>South America</i> |                          |        |        |         |         |         |                |                           |                      |                                        |
| Whole<br>blood       | Brasil                   | 155    |        |         |         |         |                | 0.001                     | GC/MS                | (Rudge et al. 2012)<br>2007-08         |
| <i>Asia</i>          |                          |        |        |         |         |         |                |                           |                      |                                        |
| plasma               | Russia/<br>women         | 48     |        |         |         |         |                | nd-0.14                   | GC/MS                | (Eik Anda et al. 2007)<br>2007         |
| serum                | Russia/<br>women         | 446    |        |         |         |         | 0.003-<br>0.04 | 0.003-0.3                 | GC/HRMS              | (Humblet et al. 2010)<br>2003-05       |
| plasma               | Russia                   | 50     |        |         |         |         |                | 0.012-0.26                | GC/MS                | (Sandanger et al.<br>2003)             |
| serum                | Korea/urban              | 40     |        |         |         |         |                | nd-0.08                   | GC/HRMS              | (Kang et al. 2008)<br>2008             |
| serum                | Korea/<br>gen.pop.       | 87     |        | nd-0.12 |         |         | nd-0.12        | nd-0.13                   | HRGC/<br>HRMS        | (Park et al. 2007)<br>2007             |
| serum                | China/<br>occup. exp.    | 47     |        | nd-0.02 |         |         | nd-0.05        | nd-0.02                   | GC/MS                | (Bi et al. 2007)<br>2007               |
| whole<br>blood       | China/<br>occup. exp.    | 50     |        |         |         |         |                | 0.03 <sup>c</sup>         | HRGC/<br>HRMS        | (Ling et al. 2008)                     |
| plasma               | Hong-Kong/<br>gen. pop.  | 111    |        |         |         |         |                | 0.002-0.04                | GC/MS                | (Qin et al. 2011)<br>2008              |
| plasma               | Bangladesh/<br>gen. pop. | 98     |        |         |         |         |                | 0.04-0.65                 | GC/ECD               | (Zamir et al. 2009)                    |
| plasma               | Vietnam/<br>women        | 189    |        |         |         |         | 0.02-0.25      | 0.02-0.07                 | GC/MS                | (Hansen et al. 2009)<br>2005           |
| serum                | Japan/<br>cancer         | 51     |        |         |         |         |                | nd-0.12                   | HRGC/<br>HRMS        | (Nomiyama et al.<br>2009)              |

| Sample         | Country/<br>population | Number | PCB 91        | PCB 95                        | PCB 132          | PCB 136              | PCB 149                       | PCB 183    | Analytical<br>method | Ref/<br>year                      |
|----------------|------------------------|--------|---------------|-------------------------------|------------------|----------------------|-------------------------------|------------|----------------------|-----------------------------------|
| whole<br>blood | Japan/<br>gen. pop.    | 151    |               |                               |                  |                      |                               | 0.004-0.23 | HRGC/<br>HRMS        | 2001<br>(Masuda et al. 2005)      |
| whole<br>blood | Japan/<br>gen. pop.    | 24     | nd-<br>0.0003 | 0.0005-<br>0.007 <sup>b</sup> | nd-0.001         | nd-0.0006            | 0.0005-<br>0.006 <sup>b</sup> | 0.005-0.02 | HRGC/<br>HRMS        | 2005<br>(Hirai et al. 2005)       |
| whole<br>blood | Japan/<br>women        | 514    |               | 0-0.007                       | 0-0.003          |                      | 0-0.005                       | 0-0.04     | HRGC/<br>HRMS        | (Todaka et al. 2011)<br>2002-05   |
| whole<br>blood | Japan/<br>women        | 119    |               | 0-0.01 <sup>b</sup>           | 0-0.004          |                      | 0-0.01                        | 0.004-0.07 | HRGC/<br>HRMS        | (Todaka et al. 2010)<br>2002-05   |
| serum          | Japan                  | 129    |               |                               |                  |                      |                               | 0.003-0.02 | HRGC/MS              | (Hisada et al. 2014)<br>2009-11   |
| whole<br>blood | Japan/<br>elderly      | 127    |               | 0.02 <sup>b</sup>             | 0.008            |                      |                               | 0.11       | HRGC/<br>HRMS        | (Todaka et al. 2008a)<br>2004     |
| whole<br>blood | Japan/<br>women        | 195    |               | 0.0003-<br>0.011              | 0.0003-<br>0.003 |                      |                               | 0.002-0.07 | HRGC/<br>HRMS        | (Todaka et al. 2008b)<br>2002-04  |
| whole<br>blood | Japan/<br>Yusho        | 316    |               | 0-0.02 <sup>b</sup>           | 0-0.001          |                      |                               | 0.004-0.4  | HRGC/<br>HRMS        | (Todaka et al. 2009)<br>2004      |
| serum          | Taiwan/<br>Yucheng     | 56     |               |                               |                  |                      |                               | nd-0.0006  | HRGC/<br>HRMS        | (Guo et al. 1997)<br>1997         |
| <i>Europe</i>  |                        |        |               |                               |                  |                      |                               |            |                      |                                   |
| serum          | EU ministers           | 14     |               |                               |                  |                      | 0.001-<br>0.007               | 0.01-0.2   | unknown              | pdf<br>(Fängström et al.<br>2002) |
| serum          | Faroe Island           | 36     |               |                               |                  |                      |                               | 0.07-1.8   | GC/CED               | 2002<br>(Jursa et al. 2006)       |
| serum          | Slovakia/<br>gen.pop.  | 315    |               | nd-0.31                       | 0.0002-<br>0.5   | nd-0.32 <sup>b</sup> | nd-1.2                        | 0.3-5.3    | GC/MS                | 2006<br>(Dirtu et al. 2006)       |
| serum          | Romania/<br>gen .pop.  | 142    |               |                               |                  |                      |                               | nd-1.1     | GC/MS                | 2006<br>(Dirtu et al. 2009)       |
| serum          | Romania                | 53     |               |                               |                  |                      |                               | nd-0.4     | GC-MS                | 2006-07                           |
|                | Belgium                | 20     |               |                               |                  |                      |                               | nd-0.16    |                      |                                   |
|                | Belgium/<br>gen. pop.  | 5      |               |                               |                  |                      |                               | 0.07-0.2   | GC/ECD<br>and GC/MS  | (Covaci and Schepens<br>2001)     |
|                | Romania/<br>gen. pop.  | 5      |               |                               |                  |                      |                               | nd-0.18    |                      | 2001                              |
| serum          | Romania/<br>gen. pop.  | 2      |               |                               |                  |                      | 0.13-2.9                      | 0.04-0.64  | GC/ECD<br>and GC/MS  | (Covaci et al. 2001)<br>2001      |
| serum          | Romania/<br>gen. pop.  | 7      |               |                               |                  |                      | nd                            | 0.09-0.4   | GC/ECD               | (Covaci et al. 2000)              |

| Sample         | Country/<br>population          | Number | PCB 91 | PCB 95  | PCB 132 | PCB 136 | PCB 149 | PCB 183    | Analytical<br>method | Ref/<br>year                    |
|----------------|---------------------------------|--------|--------|---------|---------|---------|---------|------------|----------------------|---------------------------------|
| serum          | gen. pop.<br>Italy/gen.<br>pop. | 164    |        |         |         |         | nd-0.69 | nd-0.17    | GC/LRMS              | 2000<br>(Turci et al. 2006)     |
| serum          | Italy/gen.<br>pop.              | 134    |        |         |         |         |         | nd-0.54    | GC/HRMS              | 2006<br>(Turci et al. 2004)     |
| serum          | UK/gen. pop.                    | 154    |        | nd-0.06 |         |         | nd-0.08 | nd-0.11    | GC/MS                | 2006<br>(Thomas et al. 2006)    |
| serum          | Germany/<br>children            | 320    |        |         |         |         |         | nd-0.12    | GC/ECD               | 1999<br>(Osius et al. 1999)     |
| plasma         | Norway/<br>rural                | 31     |        |         |         |         |         | 0.02-0.16  | GC/MS                | 2006<br>(Sandanger et al. 2006) |
| serum          | Greece/<br>gen. pop.            | 61     |        |         |         |         |         | 0.003-0.06 | GC/MS                | 2007<br>(Kalantzi et al. 2011)  |
| whole<br>blood | Sweden/<br>gen. pop.            | 89     |        |         |         |         |         | 0.01-0.29  | HRGC/MS              | 2004<br>(Hardell et al. 2004)   |
| plasma         | Sweden/<br>occup. exp.          | 36     |        | 0.063   |         |         |         |            | GC/MS                | 2006<br>(Wingfors et al. 2006)  |
|                | Sweden/<br>gen. pop.            | 33     |        | 0.010   |         |         |         |            |                      |                                 |
| serum          | Finland/<br>gen. pop.           | unknwn |        |         |         |         | nd      | nd         | HRGC/ECD<br>or HRMS  | 1991<br>(Luotamo et al. 1991a)  |
|                | Finland/<br>occup. exp.         | 6      |        |         |         |         | 1.09    | 1.31       |                      |                                 |
|                | Finland/<br>acc.release         | 8      |        |         |         |         | 2.24    | nd         |                      |                                 |
| serum          | Finland/<br>gen. pop.           | 30     |        |         |         |         |         | nd-3.7     | HRGC/ECD             | 1991<br>(Luotamo et al. 1991b)  |
|                | Finland/<br>occup. exp.         | 21     |        |         |         |         |         | nd-5.7     |                      |                                 |
|                | Finland/<br>acc. release        | 33     |        |         |         |         |         | 0.1-0.3    |                      |                                 |

Abbreviations: dGC- dual column; nd- MDL or otherwise defined detection limit, where available; non-H. Lymph. – non-Hodgkins lymphoma; gen. pop. – general population; occup. exp. – occupational exposure; acc. release – accidental release; unknwn – unknown. <sup>a</sup> geometric mean; <sup>b</sup> co-eluting with another congener(s); <sup>c</sup> mean; <sup>d</sup> adjusted mean; <sup>e</sup> median; Data reexpression for the table: a) according to published data(Ward et al. 2000), the density of serum used was 1.026 g/ml, and the following units were assumed to be equivalent: ppb, ng/g, ng/ml, µg/L. The same assumption was made for blood plasma. b) The serum lipids content was calculated as 7 mg/g according to (Phillips et al. 1989) (factor x0.007), and plasma lipids were calculated as 6 mg/ml according to (Michaels et al. 1960). The whole blood lipids were assumed to be same as plasma.

## REFERENCES:

- Anderson H, Falk C, Hanrahan L, Olson J, Burse V, Needham L, Paschal D, Patterson DJ, Hill RJ (1998) Profiles of Great Lakes critical pollutants: a sentinel analysis of human blood and urine. *Environ. Health Perspect.* 106: 279-289
- Arguin H, Sanchez M, Bray GA, Lovejoy JC, Peters JC, Jandacek RJ, Chaput J-P, Tremblay A (2010) Impact of adopting a vegan diet or an olestra supplementation on plasma organochlorine concentrations: results from two pilot studies. *Br. J. Nutr.* 103: 1433-1441
- Aronson KJ, Wilson JW, Hamel M, Diarsvitri W, Fan W, Woolcott C, Heaton JPW, Nickel JC, Macneily A, Morales A (2010) Plasma organochlorine levels and prostate cancer risk. *J. Expo. Sci. Environ. Epidemiol.* 20: 434-45
- Bi X, Thomas G, Jones K, Qu W, Sheng G, Martin F, Fu J (2007) Exposure of electronics dismantling workers to polybrominated diphenyl ethers, polychlorinated biphenyls, and organochlorine pesticides in South China. *Environ. Sci. Technol.* 41: 5647-5653
- Bloom M, Weiner J, Vena J, Beehler G (2003) Exploring associations between serum levels of select organochlorines and thyroxine in a sample of New York state sportsmen: the New York State Angler Cohort Study. *Environ. Res.* 93: 52-66
- Bloom MS, Vana JE, Swanson MK, Moysich KB, Olson JR (2005) Profiles of ortho-polychlorinated biphenyl congeners, dichlorodiphenyldichloroethylene, hexachlorobenzene and Mirex among male Lake Ontario sportfish consumers: the New York State Angler Cohort Study. *Environ. Res.* 97: 178-194
- Bray GA, Lovejoy JC, Most-Windhauser M, Smith SR, Volaufova J, Denkins Y, de Jonge L, Rood J, Lefevre M, Eldridge AL, Peters JC (2002) A 9-mo randomized clinical trial comparing fat-substituted and fat-reduced diets in healthy obese men: the Ole Study. *Am. J. Clin. Nutr.* 76: 928-934
- Burse V, Groce D, Caudill S, Korver M, Phillips D, McClure P, Lapeza CJ, Head S, Miller D, Buckley D, Nassif J, Timperi R, George P (1994) Determination of polychlorinated biphenyl levels in the serum of residents and in the homogenates of seafood from the New Bedford, Massachusetts, area: a comparison of exposure sources through pattern recognition techniques. *Sci. Total Environ.* 144: 153-177
- Bush B, Snow J, Koblitz R (1984) Polychlorobiphenyl (PCB) congeners, p,p'-DDE, and hexachlorobenzene in maternal and fetal cord blood from mothers in Upstate New York. *Arch. Environ. Contam. Toxicol.* 13: 517-27
- Butler Walker J, Seddon L, McMullen E, Houseman J, Tofflemire K, Corriveau A, Weber J, Mills C, Smith S, van Oostdam J (2003) Organochlorine levels in maternal and umbilical cord blood plasma in Arctic Canada. *Sci. Total Environ.* 302: 27-52
- Center for Disease Control and Prevention (2009) Fourth National Report on Human Exposure to Environmental Chemicals, U.S. Department of Health and Human Services, Centers for Disease



Control and Prevention, Atlanta, GA,

[www.cdc.gov/exposurereport/pdf/FourthReport\\_ExecutiveSummary.pdf](http://www.cdc.gov/exposurereport/pdf/FourthReport_ExecutiveSummary.pdf)

- Chevrier J, Eskenazi B, Bradman A, Fenster L, Barr D (2007) Associations between prenatal exposure to polychlorinated biphenyls and neonatal thyroid-stimulating hormone levels in a Mexican-American population, Salinas Valley, California. *Environ. Health Persp.* 115: 1490-1496
- Côté S, Ayotte P, Dodin S, Blanchet C, Mulvad G, Petersen H, Gingras S, Dewailly E (2006) Plasma organochlorine concentrations and bone ultrasound measurements: a cross-sectional study in peri-and postmenopausal Inuit women from Greenland. *Environ. Health* 5: 33
- Covaci A, Pauwels A, Schepens P (2000) Determination of selected persistent organochlorine pollutants in human serum by solid-phase disk extraction and dual-column capillary gas chromatography with electron capture detection. *Int. J. Environ. Anal. Chem.* 76: 1
- Covaci A, Hura C, Schepens P (2001) Selected persistent organochlorine pollutants in Romania. *Sci. Total Environ.* 280: 143-152
- Covaci A, Schepens P (2001) Simplified method for determination of organochlorine pollutants in human serum by solid-phase disk extraction and gas chromatography. *Chemosphere* 43: 439-447
- De Roos A, Hartge P, Lubin J, Colt J, Davis S, Cerhan J, Severson R, Cozen W, Patterson DJ, Needham L, Rothman N (2005) Persistent organochlorine chemicals in plasma and risk of non-Hodgkin's lymphoma. *Cancer Res.* 2005: 11214-11226
- DeCaprio A, Tarbell A, Bott A, Wagemaker D, Williams R, O'Hehir C (2000) Routine analysis of 101 polychlorinated biphenyl congeners in human serum by parallel dual-column gas chromatography with electron capture detection. *J. Anal. Toxicol.* 24: 403-420
- DeCaprio AP, Johnson GW, Tarbell AM, Carpenter DO, Chiarenzelli JR, Morse GS, Santiago-Rivera AL, Schymura MJ (2005) Polychlorinated biphenyl (PCB) exposure assessment by multivariate statistical analysis of serum congener profiles in an adult Native American population. *Environ. Res.* 98: 284-302
- DeVoto E, Fiore B, Millikan R, Anderson H, Sheldon L, Sonzogni W, Longnecker M (1997) Correlations among human blood levels of specific PCB congeners and implications for epidemiologic studies. *Am. J. Ind. Med.* 32: 606-613
- Dirtu A, Cernat R, Dragan D, Mocanu R, Van Grieken R, Neels H, Covaci A (2006) Organohalogenated pollutants in human serum from lassy, Romania and their relation with age and gender. *Environ. Int.* 32: 797-803
- Dirtu AC, Jaspers VLB, Cernat R, Neels H, Covaci A (2009) Distribution of PCBs, Their Hydroxylated Metabolites, and Other Phenolic Contaminants in Human Serum from Two European Countries†. *Environ. Sci. Technol.* 44: 2876-2883
- Duebelbeis D, Pieczonka G, Kapila S, Clevenger T, Yanders A, Wilson J (1989) Application of a dual column reaction chromatography system for confirmatory analysis of polychlorinated biphenyl congeners. *Chemosphere* 19: 143-148

- Eik Anda E, Nieboer E, Dudarev A, Sandanger T, Odland J (2007) Intra- and intercompartmental associations between levels of organochlorines in maternal plasma, cord plasma and breast milk, and lead and cadmium in whole blood, for indigenous peoples of Chukotka, Russia. *J. Environ. Monit.* 9: 884-893
- Fait A, Grossman E, Self S, Jeffries J, Pellizzari E, Emmett E (1989) Polychlorinated biphenyl congeners in adipose tissue lipid and serum of past and present transformer repair workers and a comparison group. *Fundam. Appl. Toxicol.* 12: 42-55
- Fängström B, Athanasiadou M, Grandjean P, Weihe P, Bergman A (2002) Hydroxylated PCB metabolites and PCBs in serum from pregnant Faroese women. *Environ. Health Persp.* 110: 895-899
- Fitzgerald E, Belanger E, Gomez M, Hwang S, Jansing R, Hicks H (2007) Environmental exposures to polychlorinated biphenyls (PCBs) among older residents of upper Hudson River communities. *Environ. Res.* 104: 352-360
- Freels S, Chary L, Turyk M, Piorkowski J, Mallin K, Dimos J, Anderson H, McCann K, Burse V, Persky V (2007) Congener profiles of occupational PCB exposure versus PCB exposure from fish consumption. *Chemosphere* 69: 435-443
- Gerstenberger SL, Dellinger JA, Hansen LG (2000) Concentrations and frequencies of polychlorinated biphenyl congeners in a Native American Population that consumes Great Lake Fish. *Clin. Toxicol.* 38: 729-746
- Goncharov A, Haase R, Santiago-Rivera A, Morse G, Akwesasne Task Force on the Environment, McCaffrey R, Rej R, Carpenter D (2008) High serum PCBs are associated with elevation of serum lipids and cardiovascular disease in a Native American population. *Environ. Res.* 106: 226-239
- Guo Y, Ryan J, Lau B, Yu M, Hsu C (1997) Blood serum levels of PCBs and PCDFs in Yucheng women 14 years after exposure to a toxic rice oil. *Arch. Environ. Contam. Toxicol.* 33: 104-108
- Hansen LG, De Caprio AP, Nisbet CT (2003) PCB congener comparisons reveal exposure histories for residents of Anniston, Alabama, USA. *Fres. Environ. Bull.* 12: 181-190
- Hansen S, Odland JØ, Phi DT, Nieboer E, Sandanger TM (2009) Maternal levels of organochlorines in two communities in southern Vietnam. *Sci. Total Environ.* 408: 225-232
- Hardell L, Van Bavel B, Lindström G, Carlberg M, Eriksson M, Dreifaldt A, Wijkström H, Starkhammar H, Hallquist A, Kolmert T (2004) Concentrations of polychlorinated biphenyls in blood and the risk for testicular cancer. *Int. J. Androl.* 27: 282-290
- Herrick R, Meeker J, Hauser R, Altshul L, Weymouth G (2007) Serum PCB levels and congener profiles among US construction workers. *Environ. Health* 6: 25
- Hirai T, Fujimine Y, Watanabe S, Nakano T (2005) Congener-specific analysis of polychlorinated biphenyl in human blood from Japanese. *Environ. Geochem. Health* 27: 65-73
- Hisada A, Shimodaira K, Okai T, Watanabe K, Takemori H, Takasuga T, Koyama M, Watanabe N, Suzuki E, Shirakawa M, Noda Y, Komine Y, Arikawa N, Kato N, Yoshinaga J (2014) Associations between

- levels of hydroxylated PCBs and PCBs in serum of pregnant women and blood thyroid hormone levels and body size of neonates. *Int. J. Hyg. Environ. Health* 217: 546-553
- Humblet O, Williams PL, Korrick SA, Sergeev O, Emond C, Birnbaum LS, Burns JS, Altshul L, Patterson DG, Turner WE, Lee MM, Revich B, Hauser R (2010) Predictors of Serum Dioxin, Furan, and PCB Concentrations among Women from Chapaevsk, Russia. *Environ. Sci. Technol.* 44: 5633-5640
- Humphrey H, Gardiner J, Pandya J, Sweeney A, Gasior D, McCaffrey R, Schantz S (2000) PCB congener profile in the serum of humans consuming Great Lakes fish. *Environ. Health Persp.* 110: 167-172
- Jursa S, Chocanowa J, Petrik J, Loksa J (2006) Dioxin-like and non-dioxin like PCBs in human serum of Slovak population. *Chemosphere* 64: 686-691
- Kalantzi OI, Geens T, Covaci A, Siskos PA (2011) Distribution of polybrominated diphenyl ethers (PBDEs) and other persistent organic pollutants in human serum from Greece. *Environ. Int.* 37: 349-353
- Kang J, Park H, Chang Y, Choi J (2008) Distribution of organochlorine pesticides (OCPs) and polychlorinated biphenyls (PCBs) in human serum from urban areas in Korea. *Chemosphere* 73: 1625-1631
- Knobeloch L, Turyk M, Imm P, Anderson H (2012) Polychlorinated biphenyls in vacuum dust and blood of residents in 20 Wisconsin households. *Chemosphere* 86: 735-40
- Kosatsky T, Przybysz R, Shatenstein B, Weber J, Armstrong B (1999) Contaminant exposure in Montrealers of Asian origin fishing the St. Lawrence River: exploratory assessment. *Environ. Res.* 80: S159-S165
- LaKind JS, Berlin Jr CM, Sjödin A, Turner W, Richard YW, Needham LL, Paul IM, Stokes JL, Naiman DQ, Patterson Jr DG (2009) Do Human Milk Concentrations of Persistent Organic Chemicals Really Decline During Lactation? Chemical Concentrations During Lactation and Milk/Serum Partitioning. *Environ. Health Perspect.* 117: 1625-1631
- Liberda EN, Tsuji LJS, Martin ID, Cote S, Ayotte P, Dewailly E, Nieboer E (2014) Plasma concentrations of persistent organic pollutants in the Cree of northern Quebec, Canada: Results from the multi-community environment-and-health study. *Sci. Total Environ.* 470–471: 818-828
- Ling B, Han G, Xu Y (2008) PCB levels in humans in an area of PCB transformer recycling. *Ann. N. Y. Acad. Sci.* 1140: 135-42
- Longnecker MP, Ryan JJ, Gladen BC, Schechter AJ (2000) Correlations among human plasma levels of dioxin-like compounds and polychlorinated biphenyls (PCBs) and implications for epidemiologic studies. *Arch. Environ. Health* 55: 195-200
- Luotamo M, Hesso A, Hämeilä M (1991a) Congener specific analysis of polychlorinated biphenyls in serum and adipose tissue. *Chemosphere* 23: 651-670

- Luotamo M, Järvisalo J, Aitio A (1991b) Assessment of exposure to polychlorinated biphenyls: analysis of selected isomers in blood and adipose tissue. *Environ. Res.* 54: 121-134
- Marek RF, Thorne PS, Wang K, Dewall J, Hornbuckle KC (2013) PCBs and OH-PCBs in serum from children and mothers in urban and rural U.S. communities. *Environ. Sci. Technol.* 47: 3353-61
- Masuda Y, Haraguchi K, Kono S, Tsuji H, Pöpke O (2005) Concentrations of dioxins and related compounds in the blood of Fukuoka residents. *Chemosphere* 58: 329-344
- Medehouenou TCM, Ayotte P, Carmichael P-H, Kröger E, Verreault R, Lindsay J, Dewailly É, Tyas SL, Bureau A, Laurin D (2011) Polychlorinated biphenyls and organochlorine pesticides in plasma of older Canadians. *Environ. Res.* 111: 1313-1320
- Michaels G, Wheeler P, Barcellini A, Kinsell L (1960) Freely Extractable Lipid of Human Blood Plasma: I. Methodology and Observations in Normal and Abnormal Subjects. *Am. J. Clin. Nutr.* 38: 38-43
- Najam AR, Korver MP, Williams CC, Burse VW, Needham LL (1999) Analysis of a mixture of polychlorinated biphenyls and chlorinated pesticides in human serum by column fractionation and dual-column capillary gas chromatography with electron capture detection. *J. AOAC Int.* 82: 177-85
- Nomiyama K, Yonehara T, Yonemura S, Yamamoto M, Koriyama C, Akiba S, Shinohara R, Koga M (2009) Determination and Characterization of Hydroxylated Polychlorinated Biphenyls (OH-PCBs) in Serum and Adipose Tissue of Japanese Women Diagnosed with Breast Cancer. *Environ. Sci. Technol.* 44: 2890-2896
- Orta-García S, Pérez-Vázquez F, González-Vega C, Varela-Silva JA, Hernández-González L, Pérez-Maldonado I (2014) Concentrations of persistent organic pollutants (POPs) in human blood samples from Mexico City, Mexico. *Sci. Total Environ.* 472: 496-501
- Osius N, Karmaus W, Kruse H, Witten J (1999) Exposure to polychlorinated biphenyls and levels of thyroid hormones in children. *Environ. Health Perspect.* 107: 843-849
- Park H, Lee S, Kang J, Chang Y (2007) Congener-specific approach to human PCB concentrations by serum analysis. *Chemosphere* 68: 1699-1706
- Patterson DJ, Lapeza CJ, Barnhart E, Groce D, Burse V (1989) Gas chromatographic/mass spectrometric analysis of human serum for non-ortho (coplanar) and ortho substituted polychlorinated biphenyls using isotope-dilution mass spectrometry. *Chemosphere* 19: 127-134
- Patterson JDG, Wong L-Y, Turner WE, Caudill SP, DiPietro ES, McClure PC, Cash TP, Osterloh JD, Pirkle JL, Sampson EJ, Needham LL (2009) Levels in the U.S. population of those Persistent Organic Pollutants (2003–2004) included in the Stockholm Convention or in other long-range transboundary air pollution agreements. *Environ. Sci. Technol.* 43: 1211-1218
- Pavuk M, Olson JR, Sjödin A, Wolff P, Turner WE, Shelton C, Dutton ND, Bartell S (2014) Serum concentrations of polychlorinated biphenyls (PCBs) in participants of the Anniston Community Health Survey. *Sci. Total Environ.* 473–474: 286-297

- Pereg D, Dewailly E, Poirier G, Ayotte P (2002) Environmental exposure to polychlorinated biphenyls and placental CYP1A1 activity in Inuit women from northern Québec. *Environ Health Perspect* 110: 607-612
- Phillips DL, Pirkle JL, Burse VW, Bernert JT, Jr., Henderson LO, Needham LL (1989) Chlorinated hydrocarbon levels in human serum: effects of fasting and feeding. *Arch. Environ. Contam. Toxicol.* 18: 495-500
- Qin YY, Leung CKM, Lin CK, Leung AOW, Wang HS, Giesy JP, Wong MH (2011) Halogenated POPs and PAHs in Blood Plasma of Hong Kong Residents. *Environ. Sci. Technol.* 45: 1630-1637
- Rudge CVC, Sandanger T, Röllin HB, Calderon IMP, Volpato G, Silva JLP, Duarte G, Neto CM, Sass N, Nakamura MU, Odland JØ, Rudge MVC (2012) Levels of selected persistent organic pollutants in blood from delivering women in seven selected areas of São Paulo State, Brazil. *Environ. Int.* 40: 162-169
- Rusiecki J, Baccarelli A, Bollati V, Tarantini L, Moore L, Bonefeld-Jorgensen E (2008) Global DNA hypomethylation is associated with high serum-persistent organic pollutants in Greenlandic Inuit. *Environ. Health Perspect.* 116: 1547-1552
- Sandanger T, Brustad M, Sandau C, Lund E (2006) Levels of persistent organic pollutants (POPs) in a coastal northern Norwegian population with high fish-liver intake. *J. Environ. Monit.* 8: 552-557
- Sandanger T, Sinotte M, Dumas P, Marchand M, Sandau C, Pereg D, Bérubé S, Brisson J, Ayotte P (2007) Plasma concentrations of selected organobromine compounds and polychlorinated biphenyls in postmenopausal women of Québec, Canada. *Environ. Health Persp.* 115: 1429-34
- Sandanger TM, Brustad M, Odland JO, Doudarev AA, Miretsky GI, Chaschin V, Burkow IC, Lund E (2003) Human plasma levels of POPs, and diet among native people from Uelen, Chukotka. *J. Environ. Monit.* 5: 689-96
- Sandau C, Ayotte P, Dewailly E, Duffe J, Norstrom R (2002) Pentachlorophenol and hydroxylated polychlorinated biphenyl metabolites in umbilical cord plasma of neonates from coastal populations in Québec. *Environ. Health Persp.* 110: 411-417
- Schaeffer D, Dellinger J, Needham L, Hansen L (2006) Serum PCB profiles in Native Americans from Wisconsin based on region, diet, age, and gender: Implications for epidemiology studies. *Sci. Total Environ.* 357: 74-87
- Schantz M, Keller J, Leigh S, Patterson DJ, Sharpless K, Sjödin A, Stapleton H, Swarthout R, Turner W, Wise S (2007) Certification of SRM 1589a PCBs, pesticides, PBDEs, and dioxins/furans in human serum. *Anal. Bioanal. Chem.* 389: 1201-1208
- Schell LM, Hubicki LA, De Caprio AP, Gallo MV, Ravenscroft J, Tarbell AM, Jacobs A, David D, Worswick P, Akwesasne Task Force on the Environment (2003) Organochlorines, Lead and Mercury in Akwesasne Mohawk Youth. *Environ Health Perspect* 111: 954-961
- Spinelli J, Ng C, Weber J, Connors J, Gascoyne R, Lai A, Brooks-Wilson A, Le N, Berry B, Gallagher R (2007) Organochlorines and risk of non-Hodgkin lymphoma. *Int. J. Cancer* 121: 2767-2775

- Thomas G, Wilkinson M, Hodson S, Jones K (2006) Organohalogen chemicals in human blood from the United Kingdom. *Environ. Poll.* 141: 30-41
- Todaka T, Hori T, Hirakawa H, Kajiwara J, Yasutake D, Onozuka D, Iida T, Furue M (2008a) Congener-specific analysis of non-dioxin-like polychlorinated biphenyls in blood collected from 127 elderly residents in Nakagawa Town, Fukuoka Prefecture, Japan. *Chemosphere* 73: 865-872
- Todaka T, Hori T, Hirakawa H, Kajiwara J, Yasutake D, Onozuka D, Kato S, Sasaki S, Nakajima S, Saijo Y, Sata F, Kishi R, Iida T, Furue M (2008b) Congener-specific analysis of non-dioxin-like polychlorinated biphenyls in blood collected from 195 pregnant women in Sapporo City, Japan. *Chemosphere* 73: 923-931
- Todaka T, Hori T, Hirakawa H, Kajiwara J, Yasutake D, Onozuka D, Iida T, Furue M (2009) Concentrations of polychlorinated biphenyls in blood of Yusho patients over 35 years after the incident. *Chemosphere* 74: 902-909
- Todaka T, Hirakawa H, Kajiwara J, Hori T, Tobiishi K, Yasutake D, Onozuka D, Sasaki S, Miyashita C, Yoshioka E, Yuasa M, Kishi R, Iida T, Furue M (2010) Relationship between the concentrations of polychlorinated dibenzo-p-dioxins, polychlorinated dibenzofurans, and polychlorinated biphenyls in maternal blood and those in breast milk. *Chemosphere* 78: 185-192
- Todaka T, Hirakawa H, Kajiwara J, Onozuka D, Sasaki S, Miyashita C, Yoshioka E, Yuasa M, Kishi R, Iida T, Uchi H, Furue M (2011) Concentrations of polychlorinated dibenzo-p-dioxins, polychlorinated dibenzofurans, and polychlorinated biphenyls in blood and breast milk collected from pregnant women in Sapporo City, Japan. *Chemosphere* 85: 1694-1700
- Trejo-Acevedo A, Rivero-Perez NE, Flores-Ramirez R, Orta-Garcia ST, Varela-Silva JA, Perez-Maldonado IN (2012) Assessment of the Levels of Persistent Organic Pollutants and 1-Hydroxypyrene in Blood and Urine Samples from Mexican Children Living in an Endemic Malaria Area in Mexico. *Bull. Environ. Contam. Toxicol.* 88: 828-832
- Turci R, Mariani G, Marinaccio A, Balducci C, Bettinelli M, Fanelli R, Nichetti S, Minoia C (2004) Critical evaluation of a high-throughput analytical method for polychlorinated biphenyls in human serum: which detector for the establishment of the reference values? *Rapid Commun. Mass Spectrom.* 18: 421-434
- Turci R, Finozzi E, Catenacci G, Marinaccio A, Balducci C, Minoia C (2006) Reference values of coplanar and non-coplanar PCBs in serum samples from two Italian population groups. *Toxicol. Lett.* 162: 250-5
- Turyk M, Anderson H, Hanrahan L, Falk C, Steenport D, Needham L, Patterson DJ, Freels S, Persky V, Great Lakes Consortium (2006) Relationship of serum levels of individual PCB, dioxin, and furan congeners and DDE with Great Lakes sport-caught fish consumption. *Environ. Res.* 100: 173-183
- Ward E, Schulte P, Grajewski B, Andersen A, Patterson DJ, Turner W, Jellum E, Deddens J, Friedland J, Roeleveld N, Waters M, Butler M, DiPietro E, Needham L (2000) Serum organochlorine levels

- and breast cancer: a nested case-control study of Norwegian women. *Cancer Epidemiol. Biomarkers Prev.* 9: 1357-1367
- Whitcomb B, Schisterman E, Buck G, Weiner J, Greizerstein H, Kostyniak P (2005) Relative concentrations of organochlorines in adipose tissue and serum among reproductive age women. *Environ. Toxicol. Pharma.* 19: 203-213
- Wilson-Yang KM, Power JP, Chisholm EA, Hallett DJ, Schechter A (1992) The analysis of human blood for seventy-five PCB congeners by dual column capillary-gas chromatography. *Chemosphere* 25: 1375-1379
- Wingfors H, Seldén A, Nilsson C, Haglund P (2006) Identification of markers for PCB exposure in plasma from Swedish construction workers removing old elastic sealants. *Ann. Occup. Hyg.* 50: 65-73
- Wolff M, Schechter A (1991) Accidental exposure of children to polychlorinated biphenyls. *Arch. Environ. Contam. Toxicol.* 20: 449-453
- Wolff M, Fischbein A, Selikoff I (1992) Changes in PCB serum concentrations among capacitor manufacturing workers. *Environ. Res.* 59: 202-216
- Zamir R, Athanasiadou M, Nahar N, Mamun MIR, Mosihuzzaman M, Bergman Å (2009) Persistent organohalogen contaminants in plasma from groups of humans with different occupations in Bangladesh. *Chemosphere* 74: 453-459
